# Supplementary material
Source: PubMed Central journal article supplement (PMC8092542)
Supplement: AAC.01595-20-s0001.pdf [file AAC.01595-20-s0001.pdf]

## Supplementary Materials

### Gain-of-function mutations in acid stress response (*evgS*) protect *Escherichia coli* from killing by gallium nitrate, an antimicrobial candidate

Jie Zeng<sup>a</sup>, Liwen Wu<sup>a</sup>, Zhou Liu<sup>b,c</sup>, Yihua Lv<sup>a</sup>, Jinzhi Feng<sup>a</sup>, Weijie Wang<sup>a</sup>, Yunxin Xue<sup>a</sup>, Dai Wang<sup>a</sup>, Jiabin Li<sup>b#</sup>, Karl Drlica<sup>d</sup>, and Xilin Zhao<sup>a,b,d#</sup>

<sup>a</sup>State Key Laboratory of Molecular Vaccinology and Molecular Diagnostics, School of Public Health, Xiamen University, 4221-117 South Xiang-An Road, Xiang-An District, Xiamen, Fujian Province, 361102, China.

<sup>b</sup>Department of Infectious Diseases, The First Affiliated Hospital of Anhui Medical University, 218 Jixi Road, Hefei, Anhui Province, 230022, China

<sup>c</sup>Department of Laboratory Medicine, The Second Hospital of Anhui Medical University, 678 Fu-Rong Road, Hefei, Anhui Province, 230601, China

<sup>d</sup>Public Health Research Institute and Department of Microbiology, Biochemistry & Molecular Genetics, New Jersey Medical School, Rutgers University, 225 Warren Street, Newark, NJ 07103.

#### Supplementary Tables

**Table S1.** Bacterial strains, plasmid, and MIC of gallium nitrate (GaNt) used in this study

**Table S2.** Primers used in the study

**Table S3.** Primers used for RT-PCR

**Table S4.** Concentration-dependent acidification of citrate-buffered LB medium by gallium nitrate

**Table S5.** Concentration-dependent acidification of citrate-buffered MH medium by gallium nitrate

## Supplementary Figures

**Figure S1.** Killing of wild-type, GaNt-3, *arpA*, *kdpD*, *arpA-kdpD*, and *evgS* mutants by hydrochloric-acid-acidified (pH 3.20) medium.

**Figure S2.** Killing of wild-type and *evgS* (E701G) mutants by gallium nitrate is more rapid and extensive than by hydrochloric-acid-acidified LB medium.

**Figure S3.** Growth curves of wild-type, GaNt-3, *evgS* (E701G), and *evgS* (S582P) mutants.

**Figure S4.** Killing of wild-type, *evgA*, and various *evgS* mutants by hydrochloric-acid-acidified (pH 3.20) medium.

**Figure S5.** Killing of wild-type and various *evgS* (E701G), *gadE*, *ydeO*, *safA*, and *rpoS* mutants by hydrochloric-acid-acidified (pH 3.20) medium.

## Supplementary References

**Table S1. Bacterial strains, plasmids, and MIC of gallium nitrate (GaNt) used in this study**

| Strains  | Relevant genotype                            | Source and description                                                                                                                                                                     | GaNt MIC, mM<br>with LB medium |
|----------|----------------------------------------------|--------------------------------------------------------------------------------------------------------------------------------------------------------------------------------------------|--------------------------------|
| 1        | Wildtype                                     | <i>E. coli</i> BW25113                                                                                                                                                                     | 18.4 (12.2) <sup>a</sup>       |
| 596      | $\Delta$ <i>evgA</i>                         | This study, by kanamycin marker excision                                                                                                                                                   | 18.4                           |
| 597      | <i>evgS</i> E701G                            | This study, constructed using CRISPR-cas9                                                                                                                                                  | 18.4 (12.2) <sup>a</sup>       |
| 598      | <i>evgS</i> S582P                            | This study, constructed using CRISPR-cas9                                                                                                                                                  | 18.4                           |
| 603      | <i>arpA</i> E334A                            | This study, constructed using CRISPR-cas9                                                                                                                                                  | 18.4                           |
| 608      | $\Delta$ <i>evgS</i>                         | This study, by kanamycin marker excision                                                                                                                                                   | 18.4                           |
| 610      | GaNt-3                                       | This study, GaNt-tolerant mutant 3                                                                                                                                                         | 18.4                           |
| 611      | GaNt-4                                       | This study, GaNt-tolerant mutant 4                                                                                                                                                         | 18.4                           |
| 612      | GaNt-5                                       | This study, GaNt-tolerant mutant 5                                                                                                                                                         | 18.4                           |
| 613      | GaNt-6                                       | This study, GaNt-tolerant mutant 6                                                                                                                                                         | 18.4                           |
| 636      | <i>kdpD</i> P885T- <i>arpA</i> E334A         | This study, constructed using CRISPR-cas9                                                                                                                                                  | 18.4                           |
| 638      | <i>kdpD</i> P885T                            | This study, constructed using CRISPR-cas9                                                                                                                                                  | 18.4                           |
| 1044     | <i>evgS</i> G658A                            | This study, constructed using CRISPR-cas9                                                                                                                                                  | 18.4                           |
| 1045     | <i>evgS</i> S584F                            | This study, constructed using CRISPR-cas9                                                                                                                                                  | 18.4                           |
| 1046     | <i>evgS</i> N573K                            | This study, constructed using CRISPR-cas9                                                                                                                                                  | 18.4                           |
| 1047     | <i>evgS</i> S600I                            | This study, constructed using CRISPR-cas9                                                                                                                                                  | 18.4                           |
| 1048     | $\Delta$ <i>gadE::kan</i> , Kan <sup>R</sup> | CGSC# 11776, Keio collection JW3480                                                                                                                                                        | 18.4                           |
| 1049     | $\Delta$ <i>ydeO</i>                         | This study, constructed using CRISPR-cas9                                                                                                                                                  | 18.4                           |
| 1050     | <i>evgS</i> E701G- $\Delta$ <i>ydeO</i>      | This study, constructed using CRISPR-cas9                                                                                                                                                  | 18.4                           |
| 1051     | <i>evgS</i> E701G- $\Delta$ <i>gadE</i>      | This study, constructed using CRISPR-cas9                                                                                                                                                  | 18.4                           |
| 1052     | $\Delta$ <i>rpoS</i>                         | This study, constructed using CRISPR-cas9                                                                                                                                                  | 18.4                           |
| 1053     | <i>evgS</i> E701G- $\Delta$ <i>rpoS</i>      | This study, constructed using CRISPR-cas9                                                                                                                                                  | 18.4                           |
| 1054     | $\Delta$ <i>safA</i>                         | This study, constructed using CRISPR-cas9                                                                                                                                                  | 18.4                           |
| 1055     | <i>evgS</i> E701G- $\Delta$ <i>safA</i>      | This study, constructed using CRISPR-cas9                                                                                                                                                  | 18.4                           |
| 1056     | <i>evgA</i> D52A                             | This study, constructed using CRISPR-cas9                                                                                                                                                  | 18.4                           |
| 1057     | <i>evgS</i> E701G- <i>evgA</i> D52A          | This study, constructed using CRISPR-cas9                                                                                                                                                  | 18.4                           |
| Plasmids |                                              |                                                                                                                                                                                            |                                |
|          | pCas                                         | Kan <sup>R</sup> , <i>repA101</i> (temperature-sensitive replicon), <i>lacIq</i> -P <sub>trc</sub> fragment, sgRNA-pMB1, $\lambda$ -Red recombinase gene ( <i>exo bet gam paraB</i> ) (1). |                                |
|          | pTargetF                                     | <i>aadA</i> (spec <sup>R</sup> ), pMB1, pj23119 (synthetic promoter) N20-sgRNA (1).                                                                                                        |                                |
|          | pTargetF-sgRNA-FRT                           | spec <sup>R</sup> , sgRNA with an N20 sequence targeting the <i>FRT</i> region of Keio collection mutants after antibiotic marker excision.                                                |                                |

---

|                             |                                                                                                                                                                                                                                                       |
|-----------------------------|-------------------------------------------------------------------------------------------------------------------------------------------------------------------------------------------------------------------------------------------------------|
| pTargetF-sgRNA- <i>ydeO</i> | spec <sup>R</sup> , sgRNA with an N20 sequence targeting the <i>ydeO</i> gene of the wildtype strain, also containing homologous template for <i>ydeO</i> knockout                                                                                    |
| pTargetF-sgRNA- <i>gadE</i> | spec <sup>R</sup> , sgRNA with an N20 sequence targeting <i>gadE</i> gene of the wildtype strain, also containing homologous template for <i>gadE</i> knockout.                                                                                       |
| pTargetF-sgRNA- <i>safA</i> | spec <sup>R</sup> , sgRNA with an N20 sequence targeting <i>safA</i> gene of the wildtype strain, also containing homologous template for <i>safA</i> knockout.                                                                                       |
| pTargetF-sgRNA- <i>rpoS</i> | spec <sup>R</sup> , sgRNA with an N20 sequence targeting <i>rpoS</i> gene of the wildtype strain, also containing homologous template for <i>rpoS</i> knockout.                                                                                       |
| pCP-20                      | plasmid containing yeast FLP recombinase gene, <i>ts-rep</i> (30°C), <i>recA</i> <sup>-</sup> , Amp <sup>R</sup> (100 µg/ml), Cm <sup>R</sup> (25 µg/ml). pCP20 was used for excision of antibiotic marker from in-frame gene knockout mutant (2, 3). |

---

Abbreviations: Cm<sup>R</sup>, chloramphenicol resistance; Tc, tetracycline resistance; *aadA* (spec), spectinomycin resistance; Amp<sup>R</sup>: ampicillin resistance; Kan<sup>R</sup>: kanamycin resistance

<sup>a</sup>Gallium nitrate MIC for MH medium is shown in parentheses; MIC was determined after correction for water content of gallium nitrate powder; MIC values were 4.7 mg/ml and 3.1 mg/ml with LB and MH media, respectively.

**Table S2. Primers used in the study**

| Primer name                                 | Purpose                                                                                                                                                                                                   | Nucleotide sequence of primers (5'-3')                                              |
|---------------------------------------------|-----------------------------------------------------------------------------------------------------------------------------------------------------------------------------------------------------------|-------------------------------------------------------------------------------------|
| <i>evgA</i> (D52A)-P1                       | Construction of mutant <i>evgA</i> D52A using CRISPR system; amplification of upstream homologous sequence by PCR from wild-type strain                                                                   | AATAGGCATAGGCACCTGAAAACGC                                                           |
| <i>evgA</i> (D52A)-P2                       |                                                                                                                                                                                                           | GTAACTCCGGGGATATCGACAGCAATGAT<br>GACGATATCAGGCTT                                    |
| <i>evgA</i> (D52A)-P3                       | Construction of mutant <i>evgA</i> D52A using CRISPR system; amplification of downstream homologous sequence by PCR from wild-type strain                                                                 | AAGCCTGATATCGTCATCATTGCTGTCGAT<br>ATCCCCGGAGTT                                      |
| <i>evgA</i> (D52A)-P4                       |                                                                                                                                                                                                           | TCGTCTGGGGGGTAATTTGCTA                                                              |
| <i>kdpD</i> -P1                             | Construction of mutant <i>kdpD</i> P885T using CRISPR system; amplification of homologous <i>kdpD</i> template by PCR from GaNt-3                                                                         | TGACCACCGTACTGGGGCAATG                                                              |
| <i>kdpD</i> -P2                             |                                                                                                                                                                                                           | ATTGTTGAGCAGCACCGCCAGC                                                              |
| <i>kdpD</i> -check-P1                       | Amplification and sequencing of <i>kdpD</i> for mutation confirmation                                                                                                                                     | TGACCACCGTACTGGGGCAATG                                                              |
| <i>kdpD</i> -check-P2                       |                                                                                                                                                                                                           | GCAGATGTCCCATATAAATACGCA                                                            |
| <i>arpA</i> -P1                             | Construction of mutant <i>arpA</i> Q334G using CRISPR system; amplification of homologous <i>arpA</i> template by PCR from GaNt-3                                                                         | GCTCTAGACGCAAAGGGTTACATGCCTA                                                        |
| <i>arpA</i> -P2                             |                                                                                                                                                                                                           | AACTGCAGATGTCTGCCGCTCACGTTC                                                         |
| <i>arpA</i> -check-P1                       | Amplification and sequencing of <i>arpA</i> for mutation confirmation                                                                                                                                     | GCCTGCTAACCACGATGCAA                                                                |
| <i>arpA</i> -check-P2                       |                                                                                                                                                                                                           | AGCTACCGCGAATATCTCGTT                                                               |
| FRT-sgRNA-5'                                | Construction of sgRNA targeting the FRT sequence of Keio mutants for backcrossing mutant alleles into the corresponding Keio mutant strain                                                                | TCCTAGGTATAATA <b>ACTAGT</b> TCCTATTCTCTA<br>GAAAGTATGTTTTAGAGCTAGAAATAGC<br>(SpeI) |
| FRT-sgRNA-3'                                |                                                                                                                                                                                                           | AA <b>CTGCAGT</b> TCAAAAAAAGCACCGACTC<br>GG (PstI)                                  |
| <i>evgA</i> D52A- <i>evgS</i> E701G-check 1 | Amplification (with <i>evgA</i> D52A- <i>evgS</i> E701G-P2 primer) and sequencing of <i>evgA</i> D52A- <i>evgS</i> E701G for mutation confirmation                                                        | TTGATGACCATCCTCTTGCTA                                                               |
| <i>evgA</i> D52A- <i>evgS</i> E701G-P1      | Construction of <i>evgA</i> D52A mutation in <i>evgS</i> E701G background using CRISPR system; amplification of upstream homologous fragment with <i>evgA</i> D52A- <i>evgS</i> E701G-P1 plus <i>evgA</i> | TTGCTGTCGATATCCCCGGAGTT                                                             |
| <i>evgA</i> D52A- <i>evgS</i> E701G-P2      |                                                                                                                                                                                                           | TCTCTTGCGGATCTATGCGGCGGTG                                                           |

|                       |                                                                                                                                                                                                                                                                                                                                                                                            |                                                                      |
|-----------------------|--------------------------------------------------------------------------------------------------------------------------------------------------------------------------------------------------------------------------------------------------------------------------------------------------------------------------------------------------------------------------------------------|----------------------------------------------------------------------|
|                       | (D52A)-P2 and downstream homologous fragment with <i>evgA</i> (D52A)-P3 plus <i>evgA</i> D52A- <i>evgS</i> E701G-P2 by PCR from <i>evgS</i> E701G mutant template. The <i>evgA</i> D52A- <i>evgS</i> E701G-P1 and <i>evgA</i> D52A- <i>evgS</i> E701G-P2 primer pair was used to amplify full-length homologous template after annealing the upstream and downstream homologous fragments. |                                                                      |
| <i>evgS</i> -P1       | Shared upstream primer for pairing with various <i>evgS</i> P2 primers to amplify upstream <i>evgS</i> fragment for construction of various <i>evgS</i> point mutations using CRISPR system                                                                                                                                                                                                | TAGCAGAGTTGACTGAAGGCG                                                |
| <i>evgS</i> -P4       | Shared downstream primer for pairing with various <i>evgS</i> P3 primers to amplify downstream <i>evgS</i> fragment for construction of various <i>evgS</i> point mutations using CRISPR system                                                                                                                                                                                            | GCCGATTACGATTTGTTGTGG                                                |
| <i>evgS</i> S584F-P2  | Primers paired with <i>evgS</i> -P1 for amplification of upstream <i>evgS</i> S584F, <i>evgS</i> N573K, and <i>evgS</i> S600I fragments used for subsequent full-length <i>evgS</i> mutant template construction needed for CRISPR-based allelic exchange                                                                                                                                  | GGATTTCGGTAAGAAATCCGAGAGTGC                                          |
| <i>evgS</i> N573K-P2  |                                                                                                                                                                                                                                                                                                                                                                                            | CGGAATGATATTTGTTTTTCTAAATCACCC                                       |
| <i>evgS</i> S600I-P2  |                                                                                                                                                                                                                                                                                                                                                                                            | GCACTATTATGAATAATGACATTACC                                           |
| <i>evgS</i> S584F-P3  | Primers paired with <i>evgS</i> -P4 for amplification of downstream <i>evgS</i> S584F, <i>evgS</i> N573K, and <i>evgS</i> S600I fragments used for subsequent full-length <i>evgS</i> mutant template construction needed for CRISPR-based allelic exchange                                                                                                                                | GCACTCTCGGATTTCTTACCGAATCC                                           |
| <i>evgS</i> N573K-P3  |                                                                                                                                                                                                                                                                                                                                                                                            | GGGTGATTTAGAAAAACAAATATCATTCCG                                       |
| <i>evgS</i> S600I-P3  |                                                                                                                                                                                                                                                                                                                                                                                            | GGTAATGTCATTATTCATAATAGTGC                                           |
| <i>gadE</i> -sgRNA-5' | Amplification of <i>gadE</i> -sgRNA for CRISPER-based mutant construction                                                                                                                                                                                                                                                                                                                  | GG <u>ACTAGT</u> GATTTTTGATACTTTCTTTGGT<br>TTTAGAGCTAGAAATAGC (SpeI) |

|                               |                                                                                                                                         |                                                                               |
|-------------------------------|-----------------------------------------------------------------------------------------------------------------------------------------|-------------------------------------------------------------------------------|
| <i>gadE</i> -sgRNA-3'         |                                                                                                                                         | CTCAAAAAAAGCACCGACTCGG                                                        |
| <i>gadE</i> -P1               | Primer sequence for PCR amplification of homologous template upstream of <i>gadE</i> for CRISPR-based <i>gadE</i> mutant construction   | CGAGTCGGTGCTTTTTTTGAGCTGAAGAC<br>ATGAATGCG                                    |
| <i>gadE</i> -P2               |                                                                                                                                         | AGTTGCTTATGTCCTGACTACATAACTTGC<br>TCCTTAGCCG                                  |
| <i>gadE</i> -P3               | Primer sequence for PCR amplification of homologous template downstream of <i>gadE</i> for CRISPR-based <i>gadE</i> mutant construction | CGGCTAAGGAGCAAGTTATGTAGTCAGGA<br>CATAAGCAACTG                                 |
| <i>gadE</i> -P4               |                                                                                                                                         | AA <u>ACTGCAGG</u> TTTTCCGCCGATTGTGCAT<br>( <i>pst</i> I)                     |
| <i>gadE</i> -CRISPR-check-P1  | Primer (paired with <i>gadE</i> -P4) for PCR confirmation of <i>gadE</i> deletion                                                       | GGGTTTCATTTTTTTGCAACTGGCG                                                     |
| <i>evgS</i> -PAS-check-P1     | Primer pair for amplification and sequencing confirmation of various <i>evgS</i> PAS domain for mutations                               | GCTGAAGCCTTCATAACAACG                                                         |
| <i>evgS</i> -PAS-check-P2     |                                                                                                                                         | TAACAGCGTGGTTGTCATCA                                                          |
| <i>ydeO</i> -SgRNA-P1         | Amplification of <i>ydeO</i> -sgRNA for CRISPER-based mutant construction                                                               | GG <u>ACTAGT</u> TGTAATGAAACCTTGCATGG<br>TTTTAGAGCTAGAAATAGC                  |
| <i>ydeO</i> -SgRNA-P2         |                                                                                                                                         | CTCAAAAAAAGCACCGACTCGG                                                        |
| <i>ydeO</i> -P1               | Primer sequence for PCR amplification of homologous template upstream of <i>ydeO</i> for CRISPR-based <i>ydeO</i> mutant construction   | CCGAGTCGGTGCTTTTTTTGAGCGTTATCC<br>GCTAAATAACA                                 |
| <i>ydeO</i> -P2               |                                                                                                                                         | TACTCGTTAGCAAATAATCACATTTTATCTC<br>CTTAAACA                                   |
| <i>ydeO</i> -P3               | Primer sequence for PCR amplification of homologous template downstream of <i>ydeO</i> for CRISPR-based <i>ydeO</i> mutant construction | TGTTTTAAGGAGATAAAATGTGATTATTTG<br>CTAACGAGTA                                  |
| <i>ydeO</i> -P4               |                                                                                                                                         | AA <u>ACTGCAGG</u> TCCATAAAGCGTTGACATT<br>( <i>pst</i> I)                     |
| <i>ydeO</i> -CRISPR- check-P1 | Primer (paired with <i>ydeO</i> -P4) for PCR confirmation of <i>ydeO</i> deletion                                                       | ACACTTACGTTGATAGCCAT                                                          |
| <i>safA</i> -sgRNA-P1         | Amplification of <i>safA</i> -sgRNA for CRISPER-based mutant construction                                                               | GG <u>ACTAGT</u> CTGATCAATTGCCGAAAAAAG<br>TTTTAGAGCTAGAAATAGC ( <i>Spe</i> I) |
| <i>safA</i> -sgRNA-P2         |                                                                                                                                         | CTCAAAAAAAGCACCGACTCGG                                                        |
| <i>safA</i> -P1               | Primer sequence for PCR amplification of homologous template upstream of <i>safA</i> for CRISPR-based <i>safA</i> mutant construction   | CCGAGTCGGTGCTTTTTTTGAGCTATTTTC<br>CAGAATCGAAT                                 |
| <i>safA</i> -P2               |                                                                                                                                         | GCTGTTTGTTCAGCCGGTCGCATGCATT<br>TCAAATATG                                     |
| <i>safA</i> -P3               | Primer sequence for PCR amplification of homologous template                                                                            | GAAATGCATGCGACCGGCTGAAAACAAAC<br>AGCAAA                                       |

|                              |                                                                                                                                         |                                                                      |
|------------------------------|-----------------------------------------------------------------------------------------------------------------------------------------|----------------------------------------------------------------------|
| <i>safA</i> -P4              | downstream of <i>safA</i> for CRISPR-based <i>safA</i> mutant construction                                                              | AA <u>CTGCAGT</u> TCGCAGGAACAGGCA (PstI)                             |
| <i>safA</i> -CRISPR-check-P1 | Primer (paired with <i>safA</i> -P4) for PCR confirmation of <i>safA</i> deletion                                                       | AGCTCACGCCGCATGGATAGATT                                              |
| <i>rpoS</i> -sgRNA-P1        | Amplification of <i>rpoS</i> -sgRNA for CRISPER-based mutant construction                                                               | GG <u>ACTAGT</u> GCAAACGAATAGTACGGGTTG<br>TTTTAGAGCTAGAAATAGC (SpeI) |
| <i>rpoS</i> -sgRNA-P2        |                                                                                                                                         | CTCAAAAAAAGCACCGACTCGG                                               |
| <i>rpoS</i> -P1              | Primer sequence for PCR amplification of homologous template upstream of <i>rpoS</i> for CRISPR-based <i>rpoS</i> mutant construction   | GTCGGTGCTTTTTTTGAGCGCAGATGGCC<br>GCGTTGTTTATGC                       |
| <i>rpoS</i> -P2              |                                                                                                                                         | GACAGATGCTTACTTACATAAGGTGGCTCC<br>TAC                                |
| <i>rpoS</i> -P3              | Primer sequence for PCR amplification of homologous template downstream of <i>rpoS</i> for CRISPR-based <i>rpoS</i> mutant construction | CACGGGTAGGAGCCACCTTATGTAAGTAA<br>GCATCTGTCAGA                        |
| <i>rpoS</i> -P4              |                                                                                                                                         | AA <u>CTGCAG</u> ACTCTCAGAAGCGGTGATGG<br>GA (PstI)                   |
| <i>rpoS</i> -CRISPR-check-P1 | Primer (paired with <i>rpoS</i> -P4) for PCR confirmation of <i>rpoS</i> deletion                                                       | CAAGGGGATTGATATCGCAGGCA                                              |



**Table S3. Primers used for RT-PCR**

| Primer <sup>a</sup> | Nucleotide sequence of primers (5'-3') |
|---------------------|----------------------------------------|
| <i>ahpC</i> -F      | TTCTACCCGGCTGACTTTACTT                 |
| <i>ahpC</i> -R      | CTTCATCTTCACGCATGTTGTC                 |
| <i>ahpF</i> -F      | ACATCGAACTGGCCGGTATTT                  |
| <i>ahpF</i> -R      | GGTGCGAATCAGGTAGTCAAA                  |
| <i>katE</i> -F      | ATGCCAAACTGCTCTACTCCC                  |
| <i>katE</i> -R      | CAGCGCAATCGGTTTAAGGT                   |
| <i>oxyR</i> -F      | ACCTGCTACCGCATATTATCCCT                |
| <i>oxyR</i> -R      | CTCATCAAACAACGGCACTTCA                 |
| <i>soxR</i> -F      | TATCCGTAACAGCGGCAATCAG                 |
| <i>soxR</i> -R      | CCACAACCAATACATCCGTCCAGT               |
| <i>soxS</i> -F      | TATCAAAAATCGGACGCTCGGTGGT              |
| <i>soxS</i> -R      | CAGGATCTTATCGCATGGATTGACG              |
| <i>acnA</i> -F      | CACGCATAAAGATCGCCAGC                   |
| <i>acnA</i> -R      | CTTGAGGCCCAGAGTTACGG                   |
| <i>acnB</i> -F      | GTTCTTCGCGTAAATCCGCC                   |
| <i>acnB</i> -R      | CAATCACGTCGCCCATGTTC                   |
| <i>icd</i> -F       | CTATCAGGGCACTCCAAGCC                   |
| <i>icd</i> -R       | ACAATGTTCCGGGAAGCGAA                   |
| <i>sucA</i> -F      | ATGGGACGAAGAGTACCCGA                   |
| <i>sucA</i> -R      | GTAAGCGAGGTTTTCCGCAC                   |
| <i>sucC</i> -F      | AGCCGCTTCAAAAATCGGTG                   |
| <i>sucC</i> -R      | GGTTAACCGGTTGGCCATTG                   |
| <i>sdhA</i> -F      | GCTGTTTCTGCCAACTCCG                    |

---

|                         |                        |
|-------------------------|------------------------|
| <i>sdhA</i> -R          | AAGTACGAATCTTCGGCGGG   |
| <i>frdA</i> -F          | TCCACGCGACAAAGTCTCTC   |
| <i>frdA</i> -R          | TCTTTAACCGGATCGACGCC   |
| <i>frdD</i> -F          | CAAAGCGTTCTGACGAACCG   |
| <i>frdD</i> -R          | TACGCGACCAATGAAGCTCT   |
| <i>fumA</i> -F          | CGAAGATCAACCGTCAGGGG   |
| <i>fumA</i> -R          | GCCGTTAAGCGATAAGCGTG   |
| <i>fumB</i> -F          | GCGGTGATGAAGAAACGCTG   |
| <i>fumB</i> -R          | CCTTTCGCAACGCAAAGGAA   |
| <i>fumC</i> -F          | TTTCCGCATTTGACGGAGA    |
| <i>fumC</i> -R          | GATAGCCAGCGGGAATTCGT   |
| <i>mdh</i> -F           | CCGGTTAACACCACAGTTGC   |
| <i>mdh</i> -R           | CACCAGAGTGACCGCCAATA   |
| <i>mgo</i> -F           | GAAGTGAAGTACACCCCGCA   |
| <i>mgo</i> -R           | ATTGACGTTATCCTCGCCCC   |
| <i>aceA</i> -F          | AGTGCCAACTCAGGAAGCTATT |
| <i>aceA</i> -R          | TAAATTCGCTGTCATACGGGTC |
| <i>aceB</i> -F          | TTCCGAGCAAAGATGAAGAGC  |
| <i>aceB</i> -R          | CGAGAATGTCGTTGAATACCG  |
| 16S-qPCR-F <sup>b</sup> | CTTACGACCAGGGCTACACAC  |
| 16S-qPCR-R <sup>b</sup> | CGGACTACGACGCACTTTATG  |

---

<sup>a</sup>F and R indicate forward and reverse, respectively

<sup>b</sup>16S ribosomal RNA

**Table S4. Gallium nitrate concentration-dependent acidification of citrate-buffered LB medium**

| [Gallium nitrate] (mM) | pH (before/after) <sup>a</sup> |
|------------------------|--------------------------------|
| 0                      | 7.16/8.37                      |
| 9.2                    | 6.14/5.91                      |
| 18.4 <sup>b</sup>      | 5.60/5.55                      |
| 36.8                   | 4.88/4.86                      |
| 55.2                   | 4.25/4.19                      |
| 73.6                   | 3.20/3.16                      |

<sup>a</sup>Indicating pH values measured before and after incubation of bacterial inoculum for MIC determination.

<sup>b</sup>Indicating MIC value determined with citrate (54.3 mM)-buffered LB medium.

**Table S5. Gallium nitrate concentration-dependent acidification of citrate-buffered MH medium**

| [Gallium nitrate] (mM) | pH (before/after) <sup>a</sup> |
|------------------------|--------------------------------|
| 0                      | 7.25/8.29                      |
| 6.1                    | 6.45/6.40                      |
| 12.2 <sup>b</sup>      | 6.00/5.98                      |
| 18.4                   | 5.72/5.73                      |
| 24.4                   | 5.42/5.43                      |
| 36.8                   | 5.16/5.12                      |
| 48.8                   | 4.26/4.20                      |
| 55.1                   | 3.99/3.91                      |

<sup>a</sup>Indicating pH values measured before and after incubation of bacterial inoculum for MIC determination.

<sup>b</sup>Indicating MIC value determined with citrate (54.3 mM)-buffered MH medium.

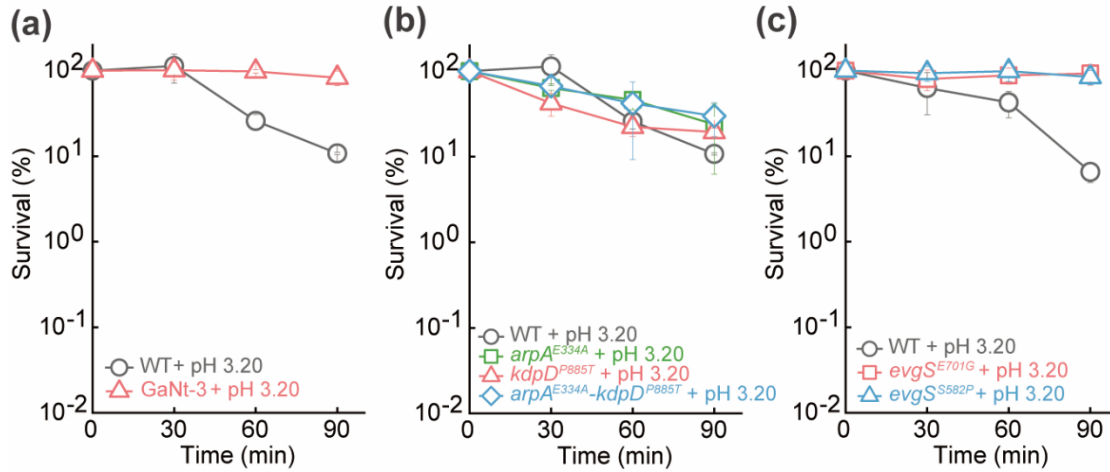

**Figure S1.** Killing of wild-type, GaNt-3, *arpA*, *kdpD*, *arpA-kdpD*, and *evgS* mutants by hydrochloric-acid-acidified (pH 3.20) medium. Exponentially growing cultures of *E. coli* were treated by adjusting the pH of the LB medium (supplemented with 54.3 mM sodium citrate) to 3.20 with hydrochloric acid and then incubated for the indicated times followed by determination of survival as colony forming units (CFU). Percent survival was determined relative to CFU at the time of acid addition. Panel *a*. Protection from acid-mediated killing by mutant GaNt-3. Panel *b*. Lack of protection from killing by mutations in *arpA* and *kdpD*. Panel *c*. Protection from acid-mediated killing by two *evgS* mutants. All experiments were performed in triplicate; error bars indicate standard error of the mean.

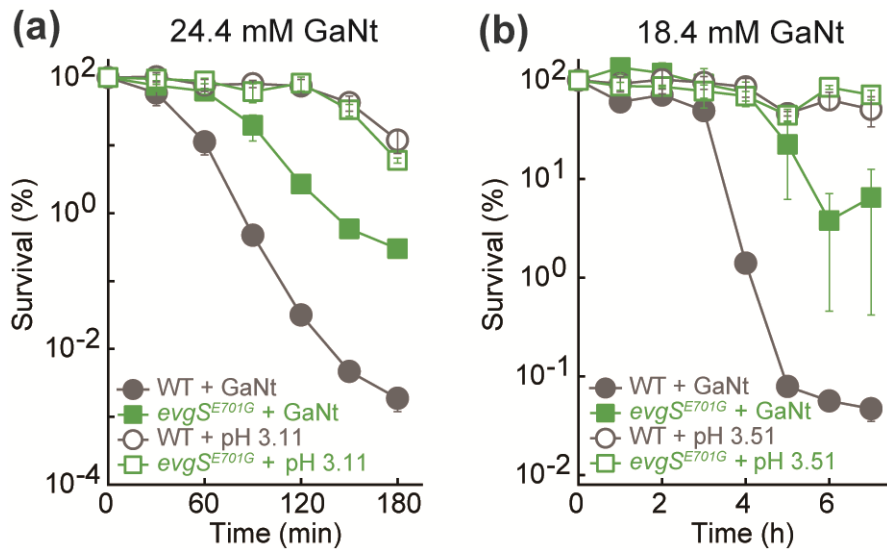

**Figure S2.** Killing of wild-type and *evgS* (E701G) mutants by gallium nitrate is more rapid and extensive than by hydrochloric-acid-acidified LB medium. Exponentially growing cultures of *E. coli* were treated either with 24.4 mM (panel *a*) or 18.4 mM (panel *b*) gallium nitrate or by adjusting the pH of the LB medium to 3.11 or 3.51 with hydrochloric acid as medium acidification controls for 24.4 mM and 18.4 mM gallium nitrate treatment, respectively. Samples were then incubated for the indicated times, followed by determination of survival as in Figure S1. All experiments were performed in triplicate; error bars indicate standard error of the mean.

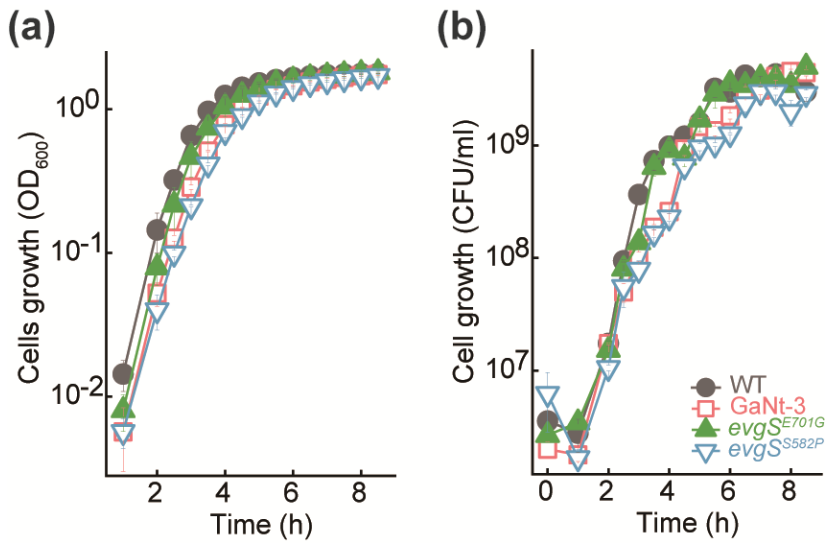

**Figure S3.** Bacterial growth rate is affected little by the GaNt-3, *evgS* (E701G), and *evgS* (S582P) mutations. Overnight cultures of *E. coli* were diluted by 2000-fold into fresh LB medium supplemented with 54.3 mM of sodium citrate. Cultures were incubated at 37 °C with rotary shaking at 250 rpm for 9 h. At the indicated times, aliquots were taken for determination of OD<sub>600</sub> and colony forming units (CFU). Log of OD<sub>600</sub> (a) or CFU (b) was plotted as a function of incubation time. All experiments were performed in triplicate; error bars indicate standard error of the mean.

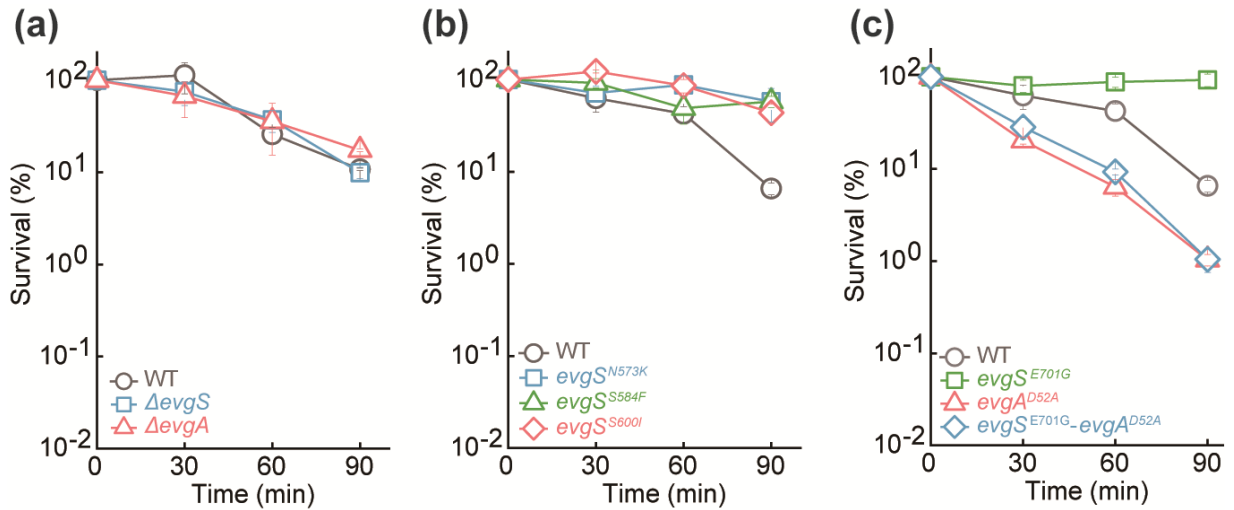

**Figure S4.** Killing of wild-type, *evgA*, and various *evgS* mutants by hydrochloric-acid-acidified (pH 3.20) medium. Exponentially growing cultures of *E. coli* were treated by adjusting the pH of the LB medium (supplemented with 54.3 mM sodium citrate) to 3.20 with hydrochloric acid and then incubated for the indicated times followed by determination of survival as in Figure S1. Panel *a*. Survival is unaffected by deletion of *evgA* or *evgS*. Panel *b*. Three *evgS* point mutations slightly protect from acid-mediated killing. Panel *c*. Point mutation in *evgA* is moderately hypersensitive to acid-mediated killing; when combined with a point mutation in *evgS* the double mutant is as sensitive as the *evgA* single mutant to acid treatment. All experiments were performed in triplicate; error bars indicate standard error of the mean.

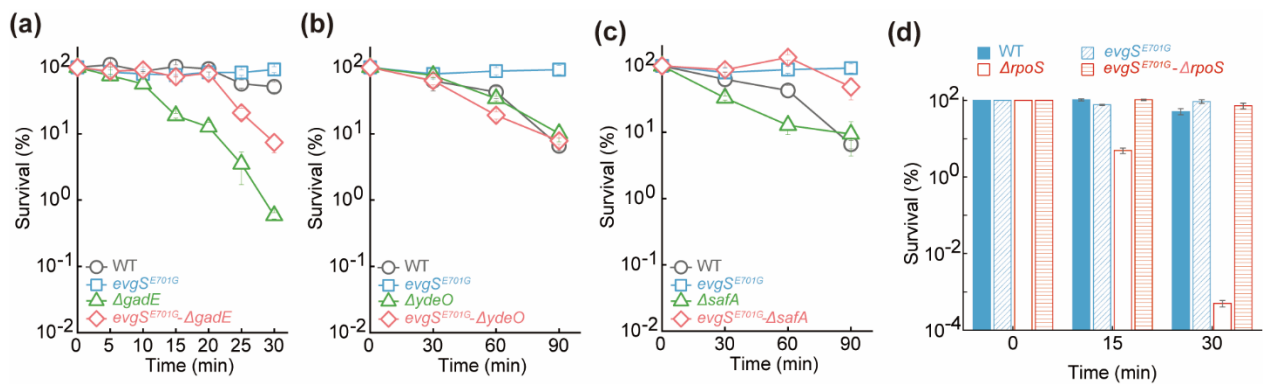

**Figure S5.** Killing of wild-type and various *evgS* (E701G), *gadE*, *ydeO*, *safA*, and *rpoS* mutants by hydrochloric-acid-acidified (pH 3.20) medium. Exponentially growing cultures of *E. coli* were treated by adjusting the pH of the LB medium (supplemented with 54.3 mM sodium citrate) to 3.20 with hydrochloric acid and then incubated for the indicated times followed by determination of survival as in Figure S1. Panel *a*. Deletion of *gadE* renders cells hypersensitive to acid, a feature that is partially reversed by a point mutation (E701G) in *evgS*. Little killing occurs with wild-type and the *evgS* (E701G) mutant. Panel *b*. An *evgS* point mutation, which by itself is protective, has no protective effect for a *ydeO* deletion. Panel *c*. Slight hypersensitivity to acid by a *safA* deletion mutant is reversed by an additional point mutation in *evgS*. Panel *d*. Hypersensitivity to acid by an *rpoS* deletion is reversed by a point mutation in *evgS*.



### Supplementary references

1. Jiang Y, Chen B, Duan C, Sun B, Yang J, Yang S. 2015. Multigene editing in the *Escherichia coli* genome via the CRISPR-Cas9 system. *Appl Environ Microbiol* 81:2506-14.
2. Baba T, Ara T, Hasegawa M, Takai Y, Okumura Y, Baba M, Datsenko KA, Tomita M, Wanner BL, Mori H. 2006. Construction of *Escherichia coli* K-12 in-frame, single-gene knockout mutants: the Keio collection. *Mol Syst Biol* 2:2006 0008.
3. Cherepanov PP, Wackernagel W. 1995. Gene disruption in *Escherichia coli*: TcR and KmR cassettes with the option of Flp-catalyzed excision of the antibiotic-resistance determinant. *Gene* 158:9-14.
